# Supplementary material for: In Vivo Detection of Human TRPV6-Rich Tumors with Anti-Cancer Peptides Derived from Soricidin
Source: PubMed Central journal article supplement (PMC3598914; doi:10.1371/journal.pone.0058866), 2013-03-15
Supplement: pone.0058866.s002.pdf [file pone.0058866.s002.pdf]

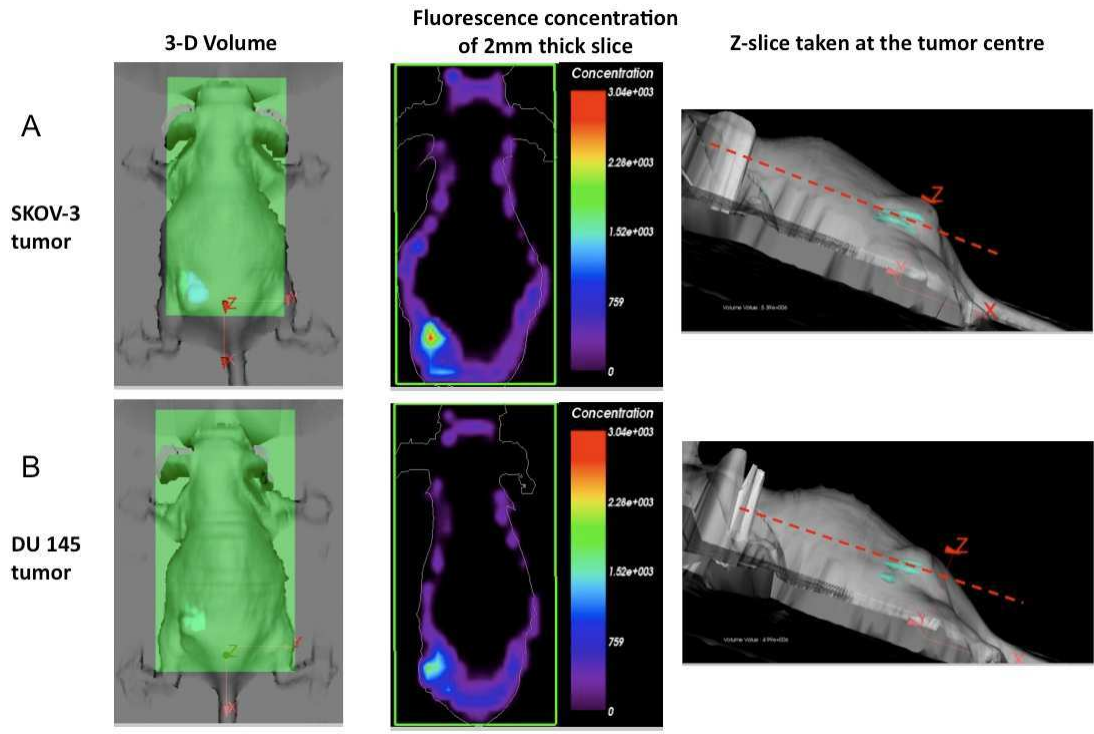

**Figure S2. Volumetric images of mice bearing ovarian and prostate xenografts.** Volumetric images of mice bearing (A) ovarian and (B) prostate xenografts were taken at about 3 hours post-injection of SOR-C27-Cy5.5. A 2 mm digital Z-slice was obtained at 3 hours to match the maximal tumor fluorescence. This technique allows discrimination of the tumor fluorescence from the fluorescence observed in kidneys.
