# Supplementary material for: In Vivo Detection of Human TRPV6-Rich Tumors with Anti-Cancer Peptides Derived from Soricidin
Source: PubMed Central journal article supplement (PMC3598914; doi:10.1371/journal.pone.0058866), 2013-03-15
Supplement: pone.0058866.s004.pdf [file pone.0058866.s004.pdf]

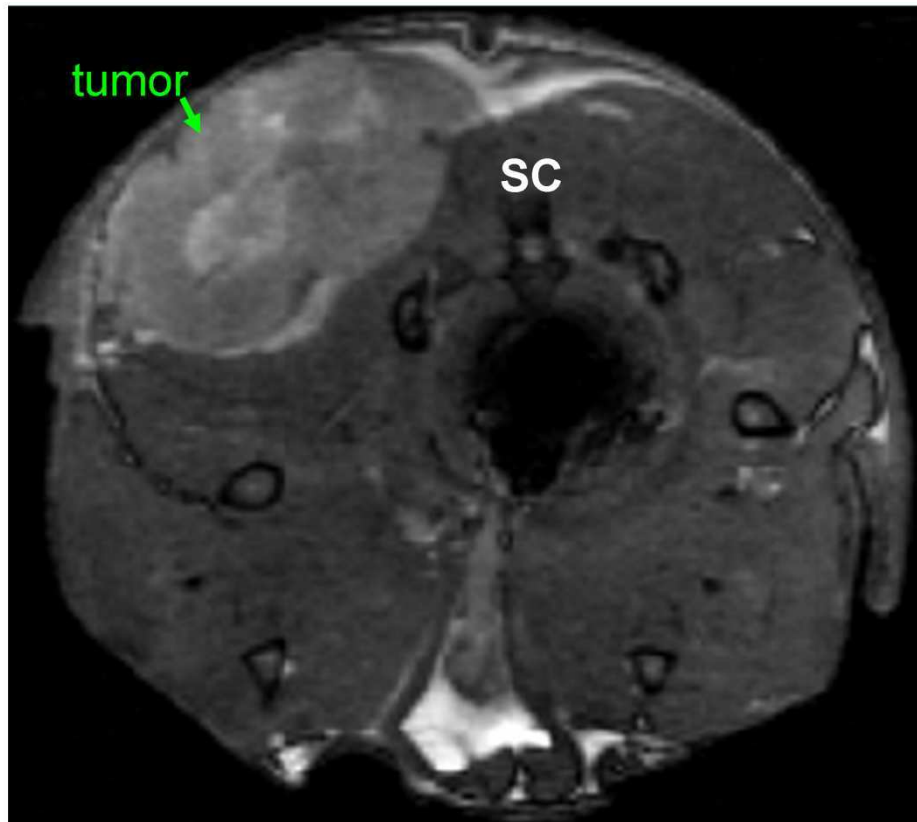

**Figure S4. Representative axial MRI image of mouse bearing a SKOV-3 xenograft tumor.**  $(150\ \mu\text{m})^3$  axial MRI image showing a representative mouse bearing a SKOV-3 xenograft tumor scanned 58 days post cell implantation;  $V_{\text{tumor}} = 296.0\ \text{mm}^3$  (SC=spinal cord).
