# Supplementary material for: In Vivo Detection of Human TRPV6-Rich Tumors with Anti-Cancer Peptides Derived from Soricidin
Source: PubMed Central journal article supplement (PMC3598914; doi:10.1371/journal.pone.0058866), 2013-03-15
Supplement: pone.0058866.s005.pdf [file pone.0058866.s005.pdf]

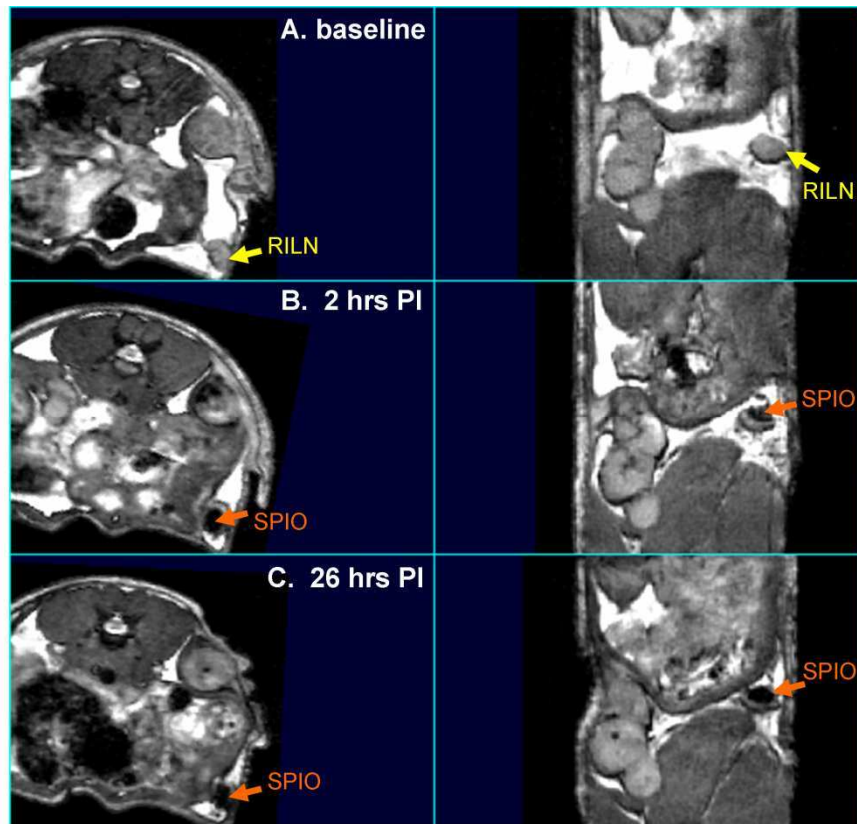

**Figure S5. Representative axial and sagittal MRI images of xenograft mouse with SPIO control.**  $(150\ \mu\text{m})^3$  axial and sagittal MRI images of mouse with control SPIO injection. (A) right inguinal lymph node (yellow arrow) at the baseline scan, (B) the presence of SPIO is seen at 2 hours as indicated by dark signal void in the inguinal lymph node, and (C) SPIO still remains at 26 hours post injection. The same trend was observed on the contralateral lymph node.
