# Supplementary material for: In Vivo Detection of Human TRPV6-Rich Tumors with Anti-Cancer Peptides Derived from Soricidin
Source: PubMed Central journal article supplement (PMC3598914; doi:10.1371/journal.pone.0058866), 2013-03-15
Supplement: pone.0058866.s006.pdf [file pone.0058866.s006.pdf]

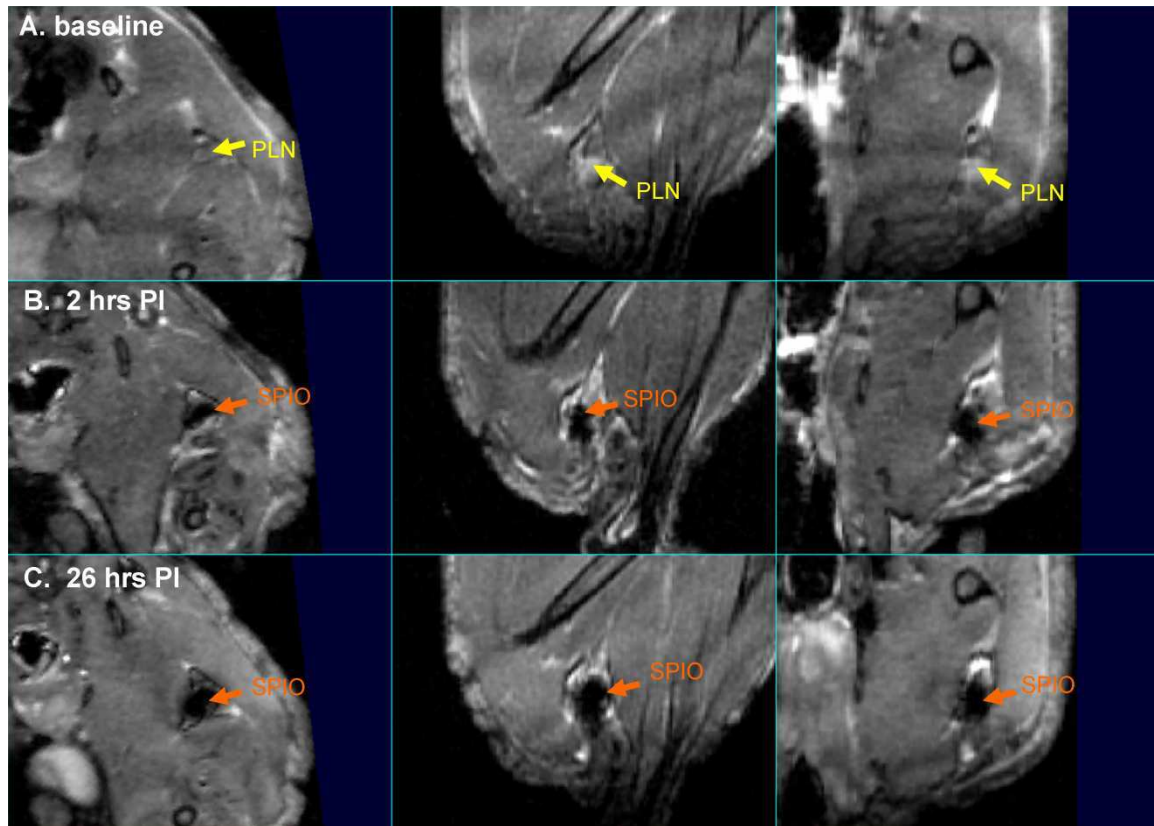

**Figure S6. Magnified representative axial, sagittal and transverse MRI images of a xenograft mouse with SOR-C27-SPIO injection.**  $(150\ \mu\text{m})^3$  (magnified) axial, sagittal and transverse MRI images of a mouse with SOR-C27-SPIO injection showing (A) right popliteal lymph node (yellow arrow) at baseline scan, (B) SPIO is seen at 2 hours as indicated by dark signal void in the popliteal lymph node, and (C) SOR-C27-SPIO still remains at 26 hours post injection. Again the same trend was observed on the contralateral lymph node.
